# Supplementary material
Source: PubMed Central journal article supplement (PMC2610512)
Supplement: M807976200_1.pdf [file M807976200_1.pdf]

### DNA Primers used in this study (5' to 3')

14083

CACGGTCTCAATGAGTGATATCTTGAACGTAAGTCAACAACG

14084

GGAATTCCAATTATAATTCCCCATTACGGCAGC

14082

GCTCTAGAGATGTGCTGTGACTGGGTTC

14085

CGTGAAGGATTTCAATGACTGTTAGTAAAATACCCATATGGCTAGATTG

14091

CGGGGTACCGAGACCATGGAGAACGGATACACCC

14092

GGAATTCCAAGGCAGGTCAACTGGC

14093

CGGGGTACCCTTTTAAGTTTATTCGGAGTTTCTCATGTGTTCTAG

14094

CCCAAGCTTCCCTTTTGAACCTCTGGTAAAGTACG

14095

CGGGGTACCCATGGCCTCTGGCACCAC

14096

GGAATTCCAGTAGCTTTTGGCTTTATAGCGTTTGC

### Plasmids used in this study

| Name    | Insert             | Vector  | Figures  |
|---------|--------------------|---------|----------|
| pPAB003 | <i>URH1</i>        | pMalc2x | Tables 1 |
| pPAB006 | <i>PNP1</i>        | pMalc2x | Tables 1 |
| pPAB008 | <i>Ppnp1-hMTAP</i> | pRS327  | Figure 2 |
| pPAB011 | <i>Ppnp1-hPNP</i>  | pRS327  | Figure 2 |

### ***S. cerevisiae* strains used in this study**

| Name   | Genotype                                                                                                                               | Figures |
|--------|----------------------------------------------------------------------------------------------------------------------------------------|---------|
| BY4742 | <i>MAT<math>\alpha</math> his3<math>\Delta</math>1 leu2<math>\Delta</math>0 lys2<math>\Delta</math>0 ura3<math>\Delta</math>0</i> (1)  | 5a, 6   |
| PAB016 | BY4742 <i>nrk1<math>\Delta</math>::HIS3 pnp1<math>\Delta</math>::kanMX4</i> (2)                                                        | 6       |
| PAB030 | BY4742 <i>NRK1::TAP-HIS3MX6</i> (2)                                                                                                    | 4       |
| PAB037 | BY4742 <i>nrk1<math>\Delta</math>::HIS3</i> (2)                                                                                        | 2a      |
| PAB038 | BY4742 <i>pnp1<math>\Delta</math>::kanMX4 urh1::NAT nrk1<math>\Delta</math>::HIS3</i> (2)                                              | 6       |
| PAB040 | BY4742 <i>nrk1<math>\Delta</math>::HIS3 urh1<math>\Delta</math>::kanMX4</i> (2)                                                        | 6       |
| PAB052 | BY4742 <i>pnp1<math>\Delta</math>::kanMX4 urh1::NAT nrk1<math>\Delta</math>::HIS3 meu1<math>\Delta</math>::LEU2 ADH4::URA3-TEL</i> (2) | 2b      |
| PAB053 | BY4742 <i>pnp1<math>\Delta</math>::kanMX4 urh1::NAT nrk1<math>\Delta</math>::HIS3 meu1<math>\Delta</math>::LEU2</i> (2)                | 2a      |
| PAB054 | BY4742 <i>URH1:: TAP-HIS3MX6</i> (2)                                                                                                   | 4       |
| PAB055 | BY4742 <i>PNP1::TAP- HIS3MX6</i> (2)                                                                                                   | 4       |
| PAB056 | BY4742 <i>MEU1::TAP- HIS3MX6</i> (2)                                                                                                   | 4       |
| JM84   | BY4742 <i>ADH4::URA3-TEL</i> (2)                                                                                                       | 2b      |
| JM85   | BY4742 <i>nrk1<math>\Delta</math>::HIS3, ADH4::URA3-TEL</i> (2)                                                                        | 2b      |
| JM88   | BY4742 <i>pnp1<math>\Delta</math>::kanMX4 urh1<math>\Delta</math>::NAT ADH4::URA3-TEL</i> (2)                                          | 2b      |
| JM89   | BY4742 <i>nrk1<math>\Delta</math>::HIS3 pnp1<math>\Delta</math>::kanMX4 urh1<math>\Delta</math>::NAT ADH4::URA3-TEL</i> (2)            | 2b      |
| KB038  | BY4742 <i>bna1<math>\Delta</math>::LEU2</i> (3)                                                                                        | 5b      |

## NaR/meNaR Syntheses

Syntheses of NaR and NaR ethyl ester have been described (4). We modified the procedure by using nicotinic acid methylester instead of nicotinic acid ethylester, to prepare both NaR and NaR methyl ester in the same synthetic sequence. Tetraacetyl ribose was reacted with excess of nicotinic acid methylester in presence of one equivalent of trimethylsilyl triflate to produce crude 2',3',5'-triacetyl NaR methylester triflate, which was deacetylated using three to four equivalents of sodium methoxide in methanol at -20 °C. At this point, the Yang et al. synthesis had produced crude meNaR, which was purified by HPLC. Our synthesis afforded a mixture of NaR and nicotinic acid methylester (the latter carried over from the first step) obviating the need for ester hydrolysis by pig liver esterase (4). The proton NMR spectrum of the crude product in D<sub>2</sub>O exhibited only one methoxy group resonance at 3.94 ppm which increased when the sample was spiked with nicotinic acid methylester. HPLC purification of the crude product afforded pure NaR, the identity of which was confirmed by comparing its NMR spectrum with that of enzymatically prepared NaR.

We hypothesize that during the reaction, the methyl group of meNaR underwent nucleophilic attack by excess sodium methoxide (Supplementary Figure 1), which resulted in formation of the more thermodynamically stable zwitterionic NaR. Similar deprotection of esters by thiolates is well known and is commonly used as a mild method for converting methylesters into their corresponding carboxylic acids (5). The ethyl group in NaR ethyl ester is hindered enough to prevent this S<sub>N</sub>2 reaction and that compound instead undergoes simple transesterification.

To produce stable meNaR, we reverted to using nicotinic acid ethylester in the reaction with tetraacetyl ribose. Deacetylation with sodium methoxide in methanol afforded crude meNaR. The <sup>1</sup>H NMR spectrum of the crude product displayed two resonances due to methoxy group protons of meNaR (4.03 ppm) and nicotinic acid methylester (3.94 ppm). meNaR was then isolated from the crude mixture by HPLC.

Both synthetic NaR triflate and meNaR triflate were obtained stereospecifically as β-anomers as evidenced by the lone doublet of the anomeric proton (6.21 ppm for NaR and 6.25 ppm for meNaR).

## Supplementary Figure 1

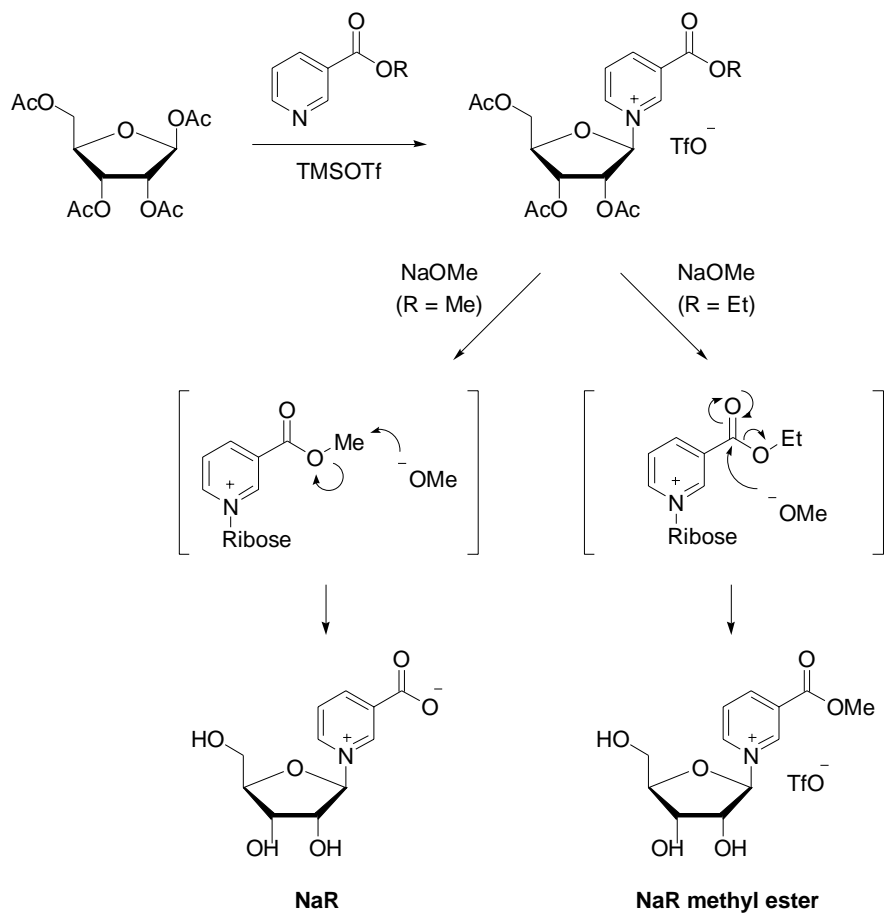

## REFERENCES

1. Brachmann, C. B., Davies, A., Cost, G. J., Caputo, E., Li, J., Hieter, P., and Boeke, J. D. (1998) *Yeast* **14**(2), 115-132
2. Ghaemmaghami, S., Huh, W. K., Bower, K., Howson, R. W., Belle, A., Dephoure, N., O'Shea, E. K., and Weissman, J. S. (2003) *Nature* **425**(6959), 737-741
3. Belenky, P. A., Moga, T. G., and Brenner, C. (2008) *J Biol Chem* **283**(13), 8075-8079
4. Yang, T., Chan, N. Y., and Sauve, A. A. (2007) *J Med Chem* **50**(26), 6458-6461
5. Salomon, C. J., Mata, E. G., and Mascaretti, O. A. (1993) *Tetrahedron* **49**(18), 3691
